# Supplementary material for: British Society of Gastroenterology (BSG) and British Society of Paediatric Gastroenterology, Hepatology and Nutrition (BSPGHAN) joint consensus guidelines on the diagnosis and management of eosinophilic oesophagitis in children and adults
Source: HighWire-hosted journal article supplement (doi:10.1136/gutjnl-2022-327326), 2022-05-23
Supplement: gutjnl-2022-327326supp001_data_supplement.xlsx [file gutjnl-2022-327326supp001_data_supplement.xlsx]

## Sheet: Round 1
	STATEMENT		GRADE		AGREEMENT
Working Group	Statement number	Statement	Level of Evidence	Strength of recommendation	Level of Agreement
Background	1	Eosinophilic Oesophagitis is a condition characterised by symptoms of dysphagia and/or food impaction in adults and feeding problems, abdominal pain and/or vomiting in children, with oesophageal histology showing >15 eosinophils/high power field, and the absence of other causes of oesophageal eosinophilia.	High	Strong	1
	2	Eosinophilic oesophagitis is increasing in incidence and prevalence in both adults and children.	High	Strong	0.96
	3	Eosinophilic oesophagitis may have seasonal variations, with increase in incidence during spring and summer and during increased grass pollen seasons.	Low	Strong	0.74
	4	Eosinophilic oesophagitis is frequently seen in males and caucasians. Having a first degree relative increases the risk of EoE. Peak is seen in early childhood and in middle age.	High	Strong	0.7
Presentation	5	In adults, food bolus obstruction and dysphagia are strongly associated with a diagnosis of EOE	Moderate	Strong	0.95
	6	In children, symptoms associated with a diagnosis of EOE may be non-specific and vary with the age of the child	Moderate	Strong	1
	7	Adults undergoing endoscopy should have oesophageal biopsies taken if they have endoscopic signs associated with EOE or food bolus obstruction or dysphagia	High	Strong	0.85
	8	All children undergoing endoscopy for upper GI symptoms should have biopsies taken to potentially diagnose EOE	Moderate	Strong	0.95
	9	Endoscopy to exclude EoE in adult patients with typical GORD symptoms refractory to twice daily proton pump inhibitors is usually not indicated, given the lown prevalence of EOE	Moderate	Strong	0.6
	10	Endoscopy to exclude EoE should be undertaken in children with typical GORD symptoms refractory to proton pump inhibitors	Moderate	Strong	1
	11	Biopsies should be taken at index endoscopy in patients with food bolus obstruction to diagnose EOE	Moderate	Strong	1
	12	Proton pump inhibitors should be ideally withdrawn for at least three weeks prior to an endoscopy to potentially diagnose EOE	Low	Strong	0.9
	13	In patients whose initial histology was not diagnostic of EOE, repeat endoscopy with adequate biopsies should be considered, if there were suggestive endoscopic features or typical symptoms of EOE	Low	Strong	0.95
	14	Diagnosing EOE earlier in its natural history may prevent long term fibrosis and strictures requiring endoscopic intervention	Low	Weak	0.8
	15	EOE that responds clinically and histologically to a proton pump inhibitor is the same disease as EOE that fails to respond to a proton pump inhibitor	High	Strong	1
	16	EOE and GORD are not mutually exclusive and can co-exist in the same patient	Moderate	Strong	1
	17	Formal transition of care from paediatric to adult services may improve symptom control, concordance with therapy and reduce emergency presentations in EOE	Low	Weak	0.75
Investigations	18	Oesophageal Physiology should be considered in patients who have ongoing dysphagia but histological remission and no evidence of obstruction on endoscopy	Low	Strong	0.95
	19	At least 4-6 biopsies should be taken from different positions within the oesophagus during diagnostic and surveillance endoscopies.	Moderate	Strong	0.85
Complications Fibrosis & Stricture Management	20	Endoscopy under-estimates the frequency of stricture and narrow lumen oesophagus. 7% - 10% of EoE developed a stricture <10mm lumen	Moderate	Strong	0.89
	21	Medical anti-inflammatory with topical steroid therapy prevents /reduces the occurrence of stricture	Moderate	Strong	0.83
	22	Therapeutic dilatation is safe and indicated in established stricture	High	Strong	1
	23	Clinical outcomes of patients with severe stricture are good if therapeutic dilatation is combined with effective anti-inflammatory therapy such as topical steroids	Moderate	Strong	1
	24	In case of food bolus obstruction, urgent referral to Gastroenterology and list for endoscopy is needed on the next endoscopy list or as an immediate emergency depending on the clinical presentation	Moderate	Strong	0.94
	25	After the bolus has been safely removed, biopsy should always be performed at the index endoscopy for food bolus obstruction.	Low	Strong	0.94
	26	Do not discharge patients after resolution of food bolus obstruction, but arrange outpatient review and subsequent follow up endoscopy in accordance with standard therapy for EoE	Low	Strong	0.83
	27	Maintenance anti-inflammatory therapy with topical steroid prevents reduces the risk of recurrent food bolus obstruction	Moderate	Strong	0.94
Perforation	28	EoE is the commonest cause of spontaneous perforation of the oesophagus, and this can occur at any age from children to adults.	High	Strong	1
	29	An EoE perforation should be managed by a multidisciplinary team including a GI surgeon, Gastroenterologist, Radiologist and Dietitian.	Weak	Strong	1
	30	In case of an EoE perforation, a CT contrast study should be performed to assess degree of extravasation	Weak	Strong	0.89
	31	In case of an EoE perforation, if there is limited extravasation, the patient should be managed conservatively with NG tube, rest the gut, PPI and antibiotics	Moderate	Strong	0.89
	32	In EoE perforations, any cavities should be drained via a drainage tube and reassessed daily in the initial stages	Moderate	Strong	0.78
	33	In case of EoE perforations, decisions on chest drainage or more invasive measures should be taken by a team approach.	Low	Strong	0.94
Complications of therapy	34	Psychological impact of dietary therapy is recognised.The psychological impact of dietary therapy should be understood and discussed with EoE patients and their carers.	Low	Strong	0.95
	35	Anxiety and depression in EoE affects patients due to persistent symptoms, social restrictions and is alleviated by effective therapy	Moderate	Strong	1
	36	Vitamin deficiencies require expert dietitian support in order to prevent complications	Weak	Strong	0.63
	37	Side effects of PPI may impact the decision on which anti inflammatory therapy to use in EoE but have no specific interaction with EoE therapies	Low	Strong	0.76
	38	Candida infection is common and should be managed by topical antifungal (nystatin) while continuing Topical steroid	Moderate	Strong	0.89
	39	Systemic effects of topical steroids have not been documented to cause long term clinical effects in EoE patients; continued monitoring of bone mineral density and adrenal suppression is recommended in children and adolescents.	High	Strong	0.94
Diagnosis	40	For a reliable diagnosis of EOE, a minimum of 6 biopsies should be obtained from at least two anatomical locations.	Moderate	Strong	0.74
	41	Eosinophil density should be expressed in eosinophil counts per mm2 and the cut off for a diagnosis of EOE should be a minimum of 50 eos per mm2	Moderate	Strong	0.84
	42	Mucosal eosinophilia should be accompanied by other histological features of EoE. These may include the presence of basal cell hyperplasia, oedema (spongiosis), eosinophil micro-abscesses, eosinophil layering, eosinophil degranulation and subepithelial sclerosis.	Moderate	Strong	1
	43	In treated disease histological response should be classified according to the eosinophil density.If using eosinophils/hpf:<15/hpf - partial remission<5/hpf- deep/complete remission	Weak	Strong	0.89
	44	In treated disease histological response should be classified according to the eosinophil density. If using eosinophils/mm2:≥ 50 eos per mm2 – No significant response.>17 but <50 eos per mm2 – Partial response.≤ 17 eos per mm2 – Remission.	Weak	Strong	0.73
Management - General	45	Patients with EoE and concomitant atopic disease should be referred for a specialist allergy opinion to optimise treatment which can impact on EoE symptoms.	Very Low	Weak	0.55
	46	After initiation of therapy (diet, drugs), histology is strongly recommended to assess response to treatment after 6-12 weeks on treatment, as symptoms may not always correlate with histologic activity	Moderate	Strong	0.78
Diet	47	Elimination diets are effective in achieving clinico-histological remission in both adults and paediatrics.	High	Strong	0.89
	48	Combining diet with pharmacological treatment is not recommended but should be considered in cases of treatment failure.	Low	Strong	0.94
	49	Six Food Elimination Diet (SFED) results in higher histologic remission rates than two or four food elimination diets, but is associated with lower compliance and increased number of endoscopies	Low	Strong	1
	50	Support from an experienced dietitian throughout the elimination and reintroduction process is strongly recommended.	Low	Strong	1
	51	Allergy testing to foods (skin prick, specific IgE, patch testing) has no role in choosing type of dietary restriction therapy.	Low	Strong	1
	52	Exclusive Elemental diets have a limited role in EoE, with high efficacy but low compliance rates and should be reserved for highly motivated individuals refractory to other treatments.	Low	Strong	1
Pharmacology	53	PPI therapy is effective in inducing histologic and clinical remission in a proportion of patients with EoE.	Moderate	Strong	1
	54	PPI therapy should be given twice daily for at least 6-12 weeks prior to assessment of histologic response while on treatment	Low	Strong	1
	55	In patients who achieve histologic response, PPI therapy appears effective in maintaining remission.	Low	Strong	0.89
	56	Topical steroids are effective for inducing histologic and clinical remission in EoE	High	Strong	1
	57	Clinical and histologic relapse is high on withdrawal of topical steroid treatment, and following clinical review, maintenance treatment should be recommended	Moderate	Strong	0.94
	58	If clinical remission is not achieved whilst on topical steroids, we recommend to repeat endoscopy to exclude fibro-stenotic disease or candida, and to obtain further histology	Low	Strong	0.94
	59	Systemic steroids are not recommended in adult EoE as oral topical steroids are as effective and safer	High	Strong	1
	60	Immunomodulators (azathioprine, 6 MP) are not recommended in management of EoE	Low	Weak	0.89
	61	Infliximab and vedolizumab have no current role in management of EoE	Low	Weak	0.78
	62	Sodium cromoglycate, Montelukast and anithistamines have no role in the management of EoE	Moderate	Strong	0.94
Dilatation	63	Endoscopic dilatation is effective in improving symptoms in patients with fibro-stenotic disease	Moderate	Strong	1
	64	Endoscopic dilatation is safe in patients with EoE and can be performed by balloon or bougie	High	Strong	0.94

## Sheet: Round 2
	STATEMENT		GRADE		AGREEMENT
Working Group	Statement number	Statement	Level of Evidence	Strength of recommendation	Level of Agreement
Presentation	3	There is seasonal variation in the symptoms of Eosinophilic oesophagitis in many patients, which seems to be associated with higher pollen counts.	Low	Weak	0.89
	4	Eosinophilic oesophagitis is more common in males than females and in Caucasians compared with other ethnic groups. Having an affected first degree relative increases the risk of eosinophilic oesophagitis. The age of incidence rises in adolescent years and peaks in early adulthood.	High	Strong	1
	9	Endoscopy to exclude eosinophilic oesophagitis in adult patients with typical GORD symptoms refractory to proton pump inhibitors is usually not indicated, given the low prevalence of eosinophilic oesophagitis in such patients, in the absence of clinical features associated with eosinophilic oesophagitis (e.g. dysphagia or atopy).	Moderate	Strong	0.94
	12	For the diagnosis of eosinophilic oesophagitis, we recommend that proton pump inhibitors are withdrawn for at least three weeks prior to endoscopy and biopsy.	Very Low	Strong	0.89
	17	Formal transition of care from paediatric to adult services may improve symptom control, concordance with therapy and reduce emergency presentations in EOE	Very Low	Weak	0.94
Investigations	19	At least 6 biopsies should be taken from different positions within the oesophagus for diagnosis and follow up of eosinophilic oesophagitis.	Moderate	Strong	1
Complications - Perforation	31	In case of a perforation in eosinophilic oesophagitis, if there is limited extravasation, the patient should be managed conservatively with a nasogastric tube, proton pump inhibitors, antibiotics and nutritional support. Any cavities should be drained and reassessed daily in the initial stages, with multi-disciplinary input from Gastroenterology, Surgery and Radiology specialists.	Moderate	Strong	1
Complications of therapy	36	When undertaking a dietary therapy for Eosinophilic oesophagitis, support from an experienced dietitian throughout both the elimination and reintroduction process is strongly recommended	Low	Strong	1
	37	If Proton pump inhibitor (PPI) therapy causes unwanted side effects (diarrhoea, gastrointestinal infections or magnesium deficiency), then consider switching to alternative treatments such as diet or topical steroid.	Moderate	Strong	0.94
Diagnosis	40	For a reliable diagnosis of EoE, a minimum of 6 biopsies should be examined from different anatomical sites in the oesophagus. Eosinophil density should be expressed as eosinophil counts per 0.3mm2 (this equates to a high power field) and the cut off for a diagnosis should be a >=15 eos per 0.3mm2 from any sample	Moderate	Strong	1
	43	In treated disease, histological response should be classified according to the eosinophil density. A partial remission is defined as a maximum eosinophil count >5 but < 15 eosinophils/0.3mm2. A complete remission is defined as a maximum eosinophil count <5 eosinophils/0.3mm2.	Weak	Strong	1
	45	Patients with EoE refractory to treatment and/or significant concomitant atopic disease should be referred to a specialist allergy clinic to optimise treatment which can impact on EoE symptoms.	Very Low	Weak	0.88
	46	After initiation of therapy (dietary or pharmacological treatment), endoscopy with biopsy on treatment is recommended to assess response, as symptoms may not always correlate with histologic activity	Moderate	Strong	1
Management - Pharmacological	61	Biologics that are typically used for IBD (e.g Infliximab, vedolizumab) have no current role in management of EoE.	Low	Weak	1
	61b	Novel biologics used in other allergic conditions (such as Dupilumab and Benralizumab) have shown promise for the treatment of EoE	Low	Weak	0.88

## Sheet: Amalgamated&FinalisedStatements
	STATEMENT		GRADE		AGREEMENT
Working Group	Statement number	Statement	Level of Evidence	Strength of recommendation	Level of Agreement
Background	1	Eosinophilic Oesophagitis is a condition characterised by symptoms of dysphagia and/or food impaction in adults and feeding problems, abdominal pain and/or vomiting in children, with oesophageal histology showing >15 eosinophils/high power field (or >15 eosinophils/0.3mm2), and the absence of other causes of oesophageal eosinophilia	High	Strong	1
	2	Eosinophilic oesophagitis is increasing in prevalence in both adults and children.	High	Strong	0.96
	3	There is seasonal variation in the symptoms of Eosinophilic oesophagitis in many patients, which seems to be associated with higher pollen counts.	Low	Weak	0.89
	4	Eosinophilic oesophagitis is more common in males than females and in people of white ethnic origin compared with other ethnic groups. Having an affected first degree relative increases the risk of eosinophilic oesophagitis. The incidence rises during adolescence and peaks in early adulthood.	High	Strong	1
Presentation	5	In adults, food bolus obstruction and dysphagia are strongly associated with a diagnosis of EOE	Moderate	Strong	0.95
	6	In children, symptoms associated with a diagnosis of EOE may be non-specific and vary with the age of the child	Moderate	Strong	1
	7	All adults undergoing endoscopy should have oesophageal biopsies taken if they have endoscopic signs associated with EOE or symptoms of dysphagia or food bolus obstruction with a normal looking oesophagus	High	Strong	0.85
	8	All children undergoing endoscopy for upper GI symptoms should have biopsies taken to diagnose EOE	Moderate	Strong	0.95
	9	Endoscopy and biopsies to exclude eosinophilic oesophagitis in adult patients with typical gastro-oesophageal reflux disease symptoms refractory to proton pump inhibitors is usually not indicated, given the low prevalence of eosinophilic oesophagitis in such patients, in the absence of clinical features associated with eosinophilic oesophagitis (e.g. dysphagia or atopy).	Moderate	Strong	0.94
	10	Endoscopy and biopsy to exclude eosinophilic oesophagitis should be undertaken in children with typical gastro-oesophageal reflux disease symptoms refractory to proton pump inhibitors	Moderate	Strong	1
	11	Oesophageal biopsies should be taken at index endoscopy in patients with food bolus obstruction to diagnose EOE	Moderate	Strong	1
	12	For an accurate diagnosis of eosinophilic oesophagitis, proton pump inhibitors should be withdrawn for at least three weeks prior to endoscopy and biopsy.	Very Low	Strong	0.89
	13	In patients where a high index of suspicion exists for a diagnosis of eosinophilic oesophagitis but whose initial histology was not diagnostic, repeat endoscopy with adequate biopsies should be considered, if there were suggestive endoscopic features or typical symptoms of eosinophilic oesophagitis	Low	Strong	0.95
	14	Diagnosing and treating eosinophilic oesophagitis effectively early in its natural history may prevent long term complications of fibrosis and strictures requiring subsequent endoscopic intervention	Low	Weak	0.8
	15	EOE that responds clinically and histologically to a proton pump inhibitor is the same disease as EOE that fails to respond to a proton pump inhibitor	High	Strong	1
	16	EOE and GORD are not mutually exclusive and can co-exist in the same patient	Moderate	Strong	1
	17	Formal transition of care from paediatric to adult services may improve symptom control, concordance with therapy and reduce emergency presentations in EOE	Very Low	Weak	0.94
Complications Fibrosis & Stricture Management	18	Endoscopy under-estimates the frequency of stricture and narrow lumen oesophagus in EoE	Moderate	Strong	0.89
	19	Medical treatment with topical steroids is likely to reduce the development of strictures in EoE	Moderate	Strong	0.83
	20	In patients with food bolus obstruction, urgent referral to gastroenterology and an endoscopy on the next available endoscopy list, or as an immediate emergency is recommended, depending on clinical presentation.	Low	Strong	0.94
	21	After spontaneous resolution of food bolus obstruction, patients should have endoscopy and outpatient review organised	Low	Strong	0.83
	22	Maintenance therapy with topical steroid reduces the risk of recurrent food bolus obstruction	Moderate	Strong	0.94
Perforation	23	EoE is the commonest cause of spontaneous perforation of the oesophagus, and this can occur at any age from children to adults.	High	Strong	1
	24	In case of an EoE perforation, a CT contrast study should be performed to assess degree of extravasation	Low	Strong	0.89
	25	In case of a perforation in eosinophilic oesophagitis, if there is limited extravasation, the patient should be managed conservatively, with multi-disciplinary input from Gastroenterology, Surgery and Radiology specialists.	Moderate	Strong	1
Complications of therapy	26	The psychological impact of dietary therapy should be understood and discussed with EoE patients and their carers.	Low	Strong	0.95
	27	Anxiety and depression in EoE affects patients due to persistent symptoms, social restrictions and is alleviated by effective therapy	Low	Strong	1
	28	When undertaking a dietary therapy for Eosinophilic oesophagitis, support from an experienced dietitian throughout both the elimination and reintroduction process is strongly recommended	Low	Strong	1
	29	If Proton pump inhibitor (PPI) therapy causes unwanted side effects (diarrhoea, gastrointestinal infections or magnesium deficiency), then consider switching to alternative treatments such as diet or topical steroid.	Moderate	Strong	0.94
	30	Candida infection occurs during the treatment of EoE and should be managed by topical antifungals (like nystatin) while continuing topical steroids	Moderate	Strong	0.89
	31	Systemic effects of topical steroids have not been documented to cause long term clinical effects in EoE patients; continued monitoring of bone mineral density and adrenal suppression is recommended in children and adolescents.	High	Strong	0.94
Diagnosis/ Investigations - Marco/ Rami/ Hasan	32	At least 6 biopsies should be taken from different anatomical sites within the oesophagus for diagnosis and follow up of eosinophilic oesophagitis.	Moderate	Strong	1
	33	Eosinophil density should be expressed as eosinophil counts per 0.3mm2 (this equates to a high power field) and the cut off for a diagnosis should be > 15 eosinophils per 0.3mm2 in any biopsy specimen	Moderate	Strong	1
	34	Mucosal eosinophilia should be accompanied by other histological features of EoE. These may include the presence of basal cell hyperplasia, oedema (spongiosis), eosinophil micro-abscesses, eosinophil layering, eosinophil degranulation and subepithelial sclerosis.	Moderate	Strong	1
	35	In treated eosinophilic oesophagitis, histological response should be classified according to the eosinophil density. Remission is defined as a maximum/peak eosinophil count < 15 eosinophils/0.3mm2.	Low	Strong	1
	36	Patients with eosinophilic oesophagitis refractory to treatment and/or with significant concomitant atopic disease should be jointly managed by a gastroenterologist and specialist allergy clinic to optimise treatment	Very Low	Weak	0.88
	37	Oesophageal physiological testing should be considered in eosinophilic oesophagitis patients who have ongoing dysphagia despite histological remission and absence of fibro-stenotic disease at endoscopy.	Low	Strong	0.95
Management - General
Diet	38	After initiation of therapy (dietary or pharmacological treatment), endoscopy with biopsy on treatment is recommended to assess response, as symptoms may not always correlate with histologic activity	Low	Strong	1
	39	Elimination diets are effective in achieving clinico-histological remission in both adults and children with eosinophilic oesophagitis	High	Strong	0.89
	40	Combining elimination diets with pharmacological treatment is not routinely recommended but can be considered in cases of treatment failure.	Very Low	Strong	0.94
	41	Six Food Elimination Diet (SFED) results in higher histologic remission rates than two or four food elimination diets, but is associated with lower compliance and increased number of endoscopies	Low	Strong	1
	42	Allergy testing to foods (skin prick, specific IgE, patch testing) has no role in choosing type of dietary restriction therapy.	Low	Strong	1
Pharmacological management	43	Exclusive Elemental diets have a limited role in EoE, with high efficacy but low compliance rates and should be reserved for patients refractory to other treatments.	Low	Strong	1
	44	PPI therapy is effective in inducing histologic and clinical remission in patients with EoE.	Moderate	Strong	1
	45	PPI therapy should be given twice daily for at least 8-12 weeks prior to assessment of histologic response while on treatment	Low	Strong	1
	46	In patients who achieve histologic response, PPI therapy appears effective in maintaining remission.	Low	Strong	0.89
	47	Topical steroids are effective for inducing histologic and clinical remission in EoE	High	Strong	1
	48	Clinical and histologic relapse is high on withdrawal of topical steroid treatment, and following clinical review, maintenance treatment should be recommended	Moderate	Strong	0.94
	49	If symptoms recur while on treatment, we recommend to repeat endoscopy for assessment and to obtain further histology	Low	Strong	0.94
	50	Systemic steroids are not recommended in EoE as oral topical steroids are as effective and safer	High	Strong	1
	51	Immunomodulators (azathioprine, 6 MP) are not recommended in management of EoE	Low	Weak	0.89
	52	Monoclonal antibody therapies that are typically used for IBD (e.g Infliximab, vedolizumab) have no current role in management of EoE.	Low	Weak	1
	53	Novel biologics used in other allergic conditions (such as Dupilumab, Cendakimab and Benralizumab) have shown promise for the treatment of EoE	Low	Weak	0.88
	54	Sodium cromoglycate, Montelukast and anithistamines have no role in the management of EoE but may have a role in concomitant atopic disease	Moderate	Strong	0.94
Dilatation	55	Endoscopic dilatation is effective in improving symptoms in patients with fibro-stenotic disease	Moderate	Strong	1
	56	Endoscopic dilatation is safe in patients with EoE and can be performed by balloon or bougie	High	Strong	0.94
	57	Clinical outcomes of patients with stricture are better if therapeutic dilatation is combined with effective anti-inflammatory therapy such as topical steroids	Moderate	Strong	1
