# Supplementary material for: British Society of Gastroenterology (BSG) and British Society of Paediatric Gastroenterology, Hepatology and Nutrition (BSPGHAN) joint consensus guidelines on the diagnosis and management of eosinophilic oesophagitis in children and adults
Source: HighWire-hosted journal article supplement (doi:10.1136/gutjnl-2022-327326), 2022-05-23
Supplement: gutjnl-2022-327326supp002_data_supplement.pdf [file gutjnl-2022-327326supp002_data_supplement.pdf]

| Author | Competing interests                                                                                                                                                                                                                                                                  |
|--------|--------------------------------------------------------------------------------------------------------------------------------------------------------------------------------------------------------------------------------------------------------------------------------------|
| AD     | Consultancy fees, honoraria, speaker fees and financial/ hospitality support to attend conferences from Takeda, Janssen, Dr Falk Pharma, Pharmacosmos, Pfizer UK, Tillotts UK, Celltrion UK, GI UK.                                                                                  |
| HNH    | Advisory board & Sponsored Speaker-Dr Falk Pharma.                                                                                                                                                                                                                                   |
| SA     | Advisory board - Dr Falk Pharma, Regeneron-Sanofi, Astra Zeneca and Eso-Cap. Sponsored speaker – Medtronic, Dr Falk Pharma, Vifol Pharma and Rafa Pharma.                                                                                                                            |
| MA     | Honoraria, speaker fees and financial/ hospitality support to attend conferences from Nutricia, Mead Johnson, Dr Falk Pharma, AbbVie, Abbott.                                                                                                                                        |
| JD     | Advisory board & Sponsored Speaker-Dr Falk Pharma.                                                                                                                                                                                                                                   |
| RS     | Advisory board & Sponsored Speaker-Dr Falk Pharma, Medtronic.                                                                                                                                                                                                                        |
| DM     | Advisory board & Sponsored Speaker-Dr Falk Pharma.                                                                                                                                                                                                                                   |
| JE     | Advisory board & Sponsored Speaker-Dr Falk Pharma.                                                                                                                                                                                                                                   |
| MN     | No conflicts of interest declared                                                                                                                                                                                                                                                    |
| HH     | No conflicts of interest declared                                                                                                                                                                                                                                                    |
| AC     | Advisory board – Astra Zeneca, Regeneron-Sanofi, Dr Falk Pharma. Sponsored speaker – AVIR, Dr Falk-Pharma                                                                                                                                                                            |
| SH     | No conflicts of interest declared                                                                                                                                                                                                                                                    |
| JH     | Advisory board & Sponsored Speaker-Dr Falk Pharma.                                                                                                                                                                                                                                   |
| KK     | No conflicts of interest declared                                                                                                                                                                                                                                                    |
| AM     | No conflicts of interest declared                                                                                                                                                                                                                                                    |
| CR     | No conflicts of interest declared                                                                                                                                                                                                                                                    |
| SS     | Advisory board & Sponsored Speaker-Dr Falk Pharma.                                                                                                                                                                                                                                   |
| PT     | Personal fees from Aimmune Therapeutics, DBV Technologies, Allergenis, and UK Food Standards Agency; grants from National Institute for Health Research (NIHR)/Imperial Biomedical Research Centre, UK Medical Research Council, UK Food Standards Agency, Jon Moulton Charity Trust |
| NT     | Advisory board, Research Support & Sponsored Speaker-Dr Falk Pharma.                                                                                                                                                                                                                 |
