# Supplementary material for: British Society of Gastroenterology (BSG) and British Society of Paediatric Gastroenterology, Hepatology and Nutrition (BSPGHAN) joint consensus guidelines on the diagnosis and management of eosinophilic oesophagitis in children and adults
Source: HighWire-hosted journal article supplement (doi:10.1136/gutjnl-2022-327326), 2022-05-23
Supplement: gutjnl-2022-327326supp003_data_supplement.pdf [file gutjnl-2022-327326supp003_data_supplement.pdf]

| GRADE – strength of evidence                                                                                                                                     | GRADE – strength of recommendation                                                                                                                                                        |
|------------------------------------------------------------------------------------------------------------------------------------------------------------------|-------------------------------------------------------------------------------------------------------------------------------------------------------------------------------------------|
| <i>High quality:</i> Further research is very unlikely to change confidence of the estimate                                                                      | <i>The trade-offs:</i> Taking into account the estimated size of the effect for main outcomes, the confidence limits around those estimates and the relative value placed on each outcome |
| <i>Moderate quality:</i> Further research is likely to have an impact on confidence in the estimate of effect and may change the estimate                        | <i>The quality of the evidence</i>                                                                                                                                                        |
| <i>Low quality:</i> Further research is very likely to have an important impact on confidence in the estimate of the effect and is likely to change the estimate | <i>Translation of the evidence into practice in a particular setting:</i> Taking into consideration important factors that could be expected to modify the size of expected effects       |
| <i>Very low quality:</i> Any estimate of effect is uncertain                                                                                                     | <i>Uncertainty about the baseline risk for the population of interest</i>                                                                                                                 |
